# Supplementary material for: Inhibition of Phosphatidylinositol 3-kinase (PI3K) Signaling Synergistically Potentiates Antitumor Efficacy of Paclitaxel and Overcomes Paclitaxel-Mediated Resistance in Cervical Cancer
Source: MDPI journal article supplement (doi:10.3390/ijms20143383), 2019-07-10
Supplement: s1 [file s1]

**A**

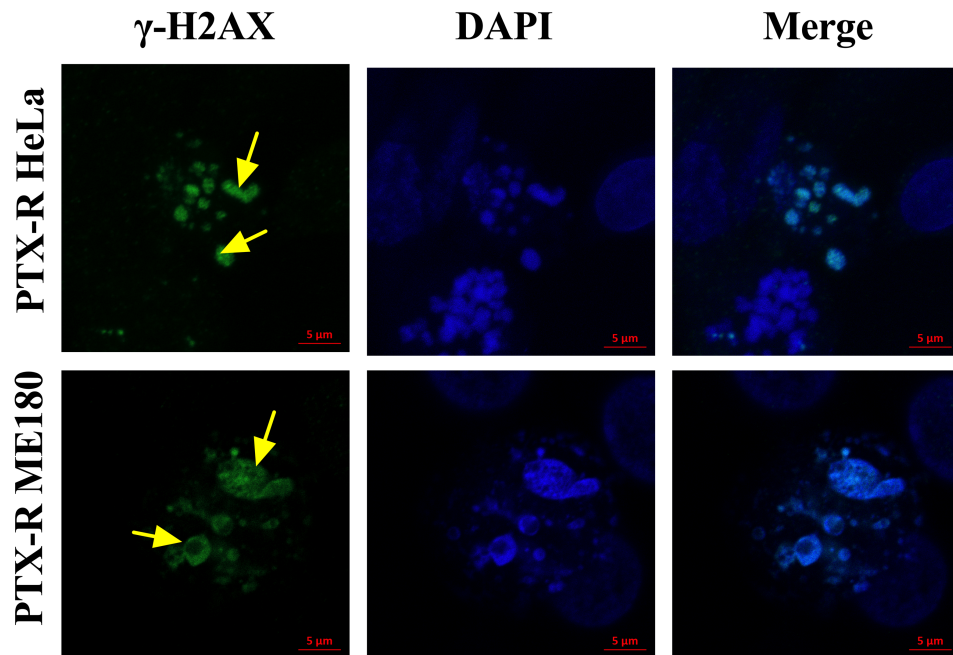

**B**

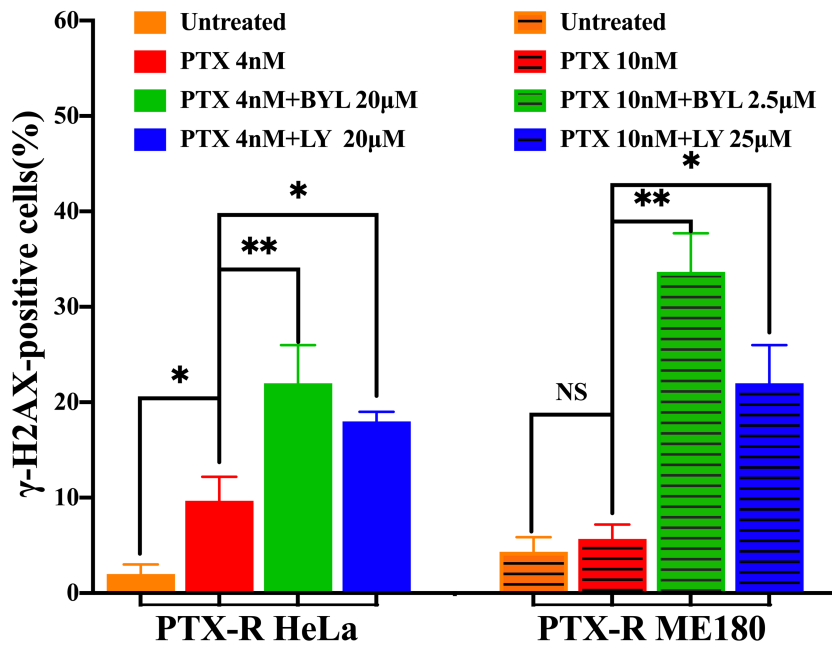

**Supplementary Figure S1.** (A) An intensive cluster staining  $\gamma$ H2AX in apoptotic bodies (yellow arrows) which is distinguishable by the entire cell (PMID:22691365). (B) Quantification of confocal data as described in **Figure 5A** after paclitaxel treatment alone or in combination with BYL-719 or LY294002 in both PTX-R HeLa and ME180 cell lines at 48h. Cells with  $\geq 5$   $\gamma$ -H2AX discrete foci/nucleus were considered to be positive. Results are presented as the mean  $\pm$  SD of three independent experiments analyzed by student's t-test. \*indicates  $P < 0.05$ , \*\* indicates  $P < 0.01$ , respectively.
